# Supplementary material for: Sequential Dynamics of Stearoyl-CoA Desaturase-1(SCD1)/Ligand Binding and Unbinding Mechanism: A Computational Study
Source: MDPI journal article supplement (doi:10.3390/biom11101435), 2021-09-30
Supplement: s1 [file s1]

# Sequential Dynamics of Stearoyl-CoA Desaturase-1(SCD1)/Ligand Binding and Unbinding Mechanism: A Computational Study

SI Material: Figures S1–S6 and Table S1

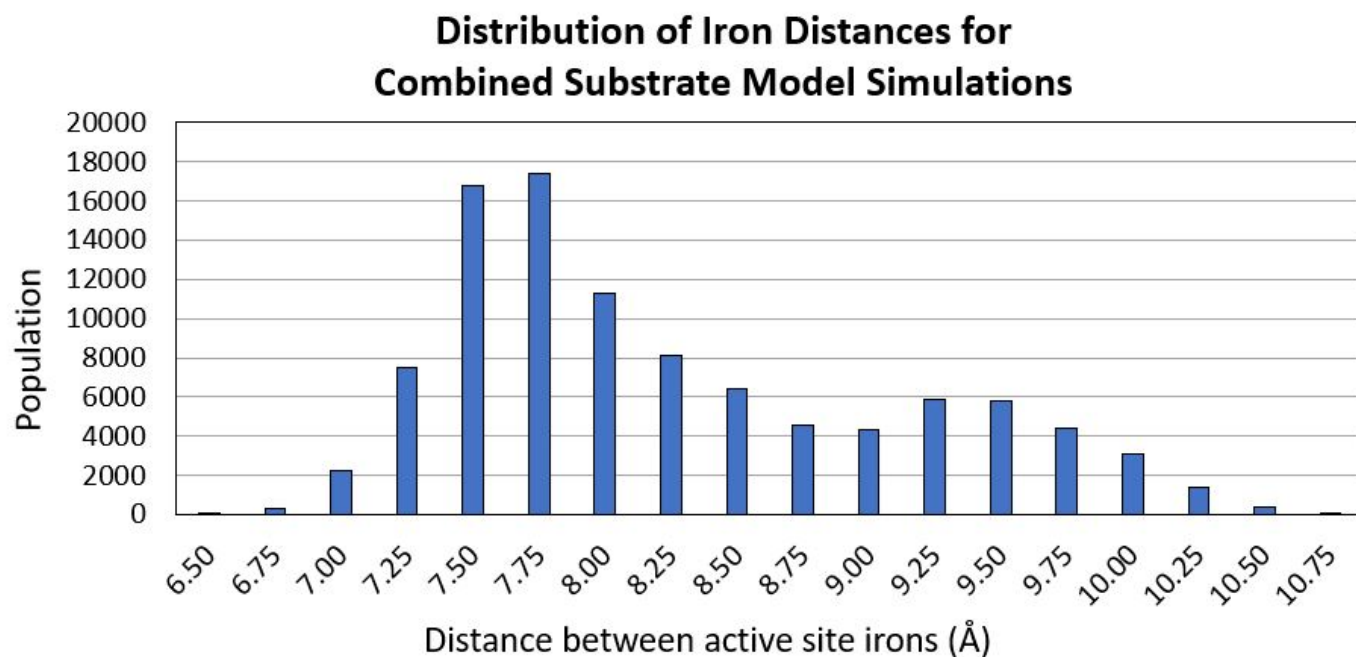

**Figure S1.** Distribution of iron distances for combined Substrate model simulations. Asterix indicates distance identified in SCD1 crystal structure.

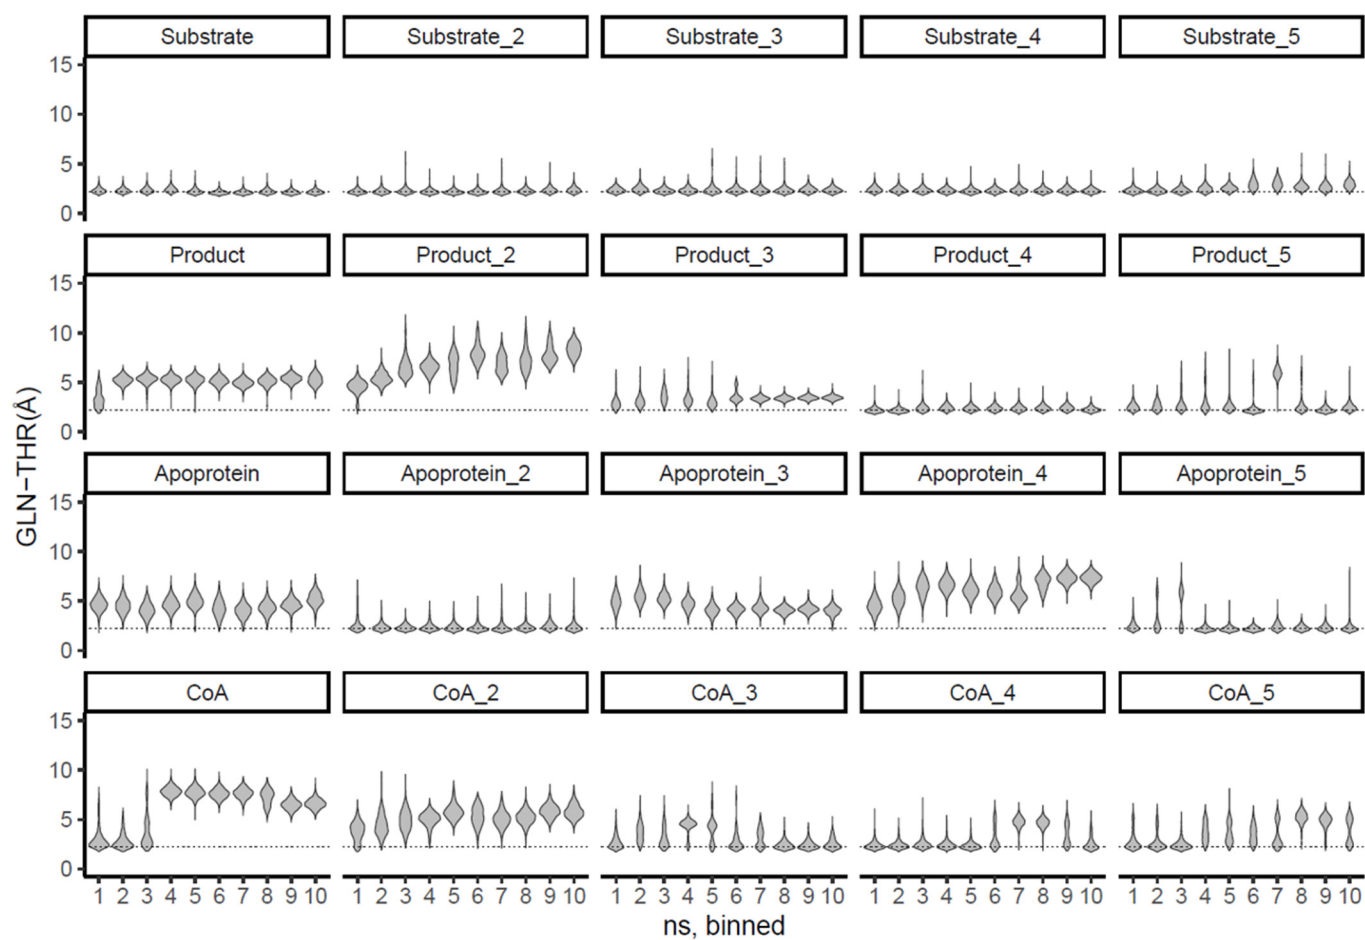

**Figure S2.** Distance between hydrogen bonding partners Gln147 and Thr261 across 100-ns simulation. Dashed line indicates maximum hydrogen bonding distance (2.2 Å).

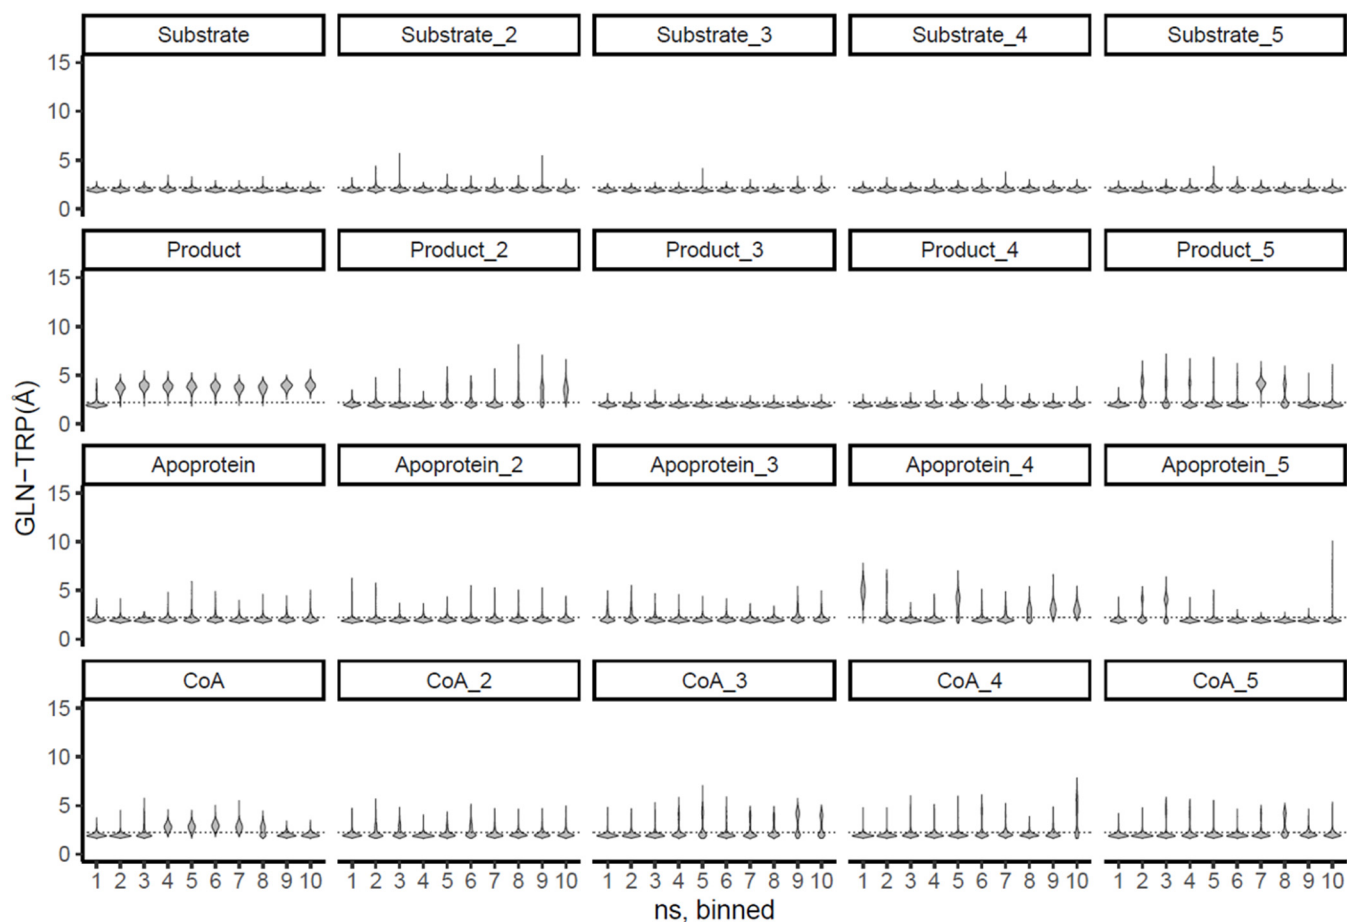

**Figure S3.** Distance between hydrogen bonding partners Gln147 and Trp153 across 100-ns simulation. Dashed line indicates maximum hydrogen bonding distance (2.2 Å).

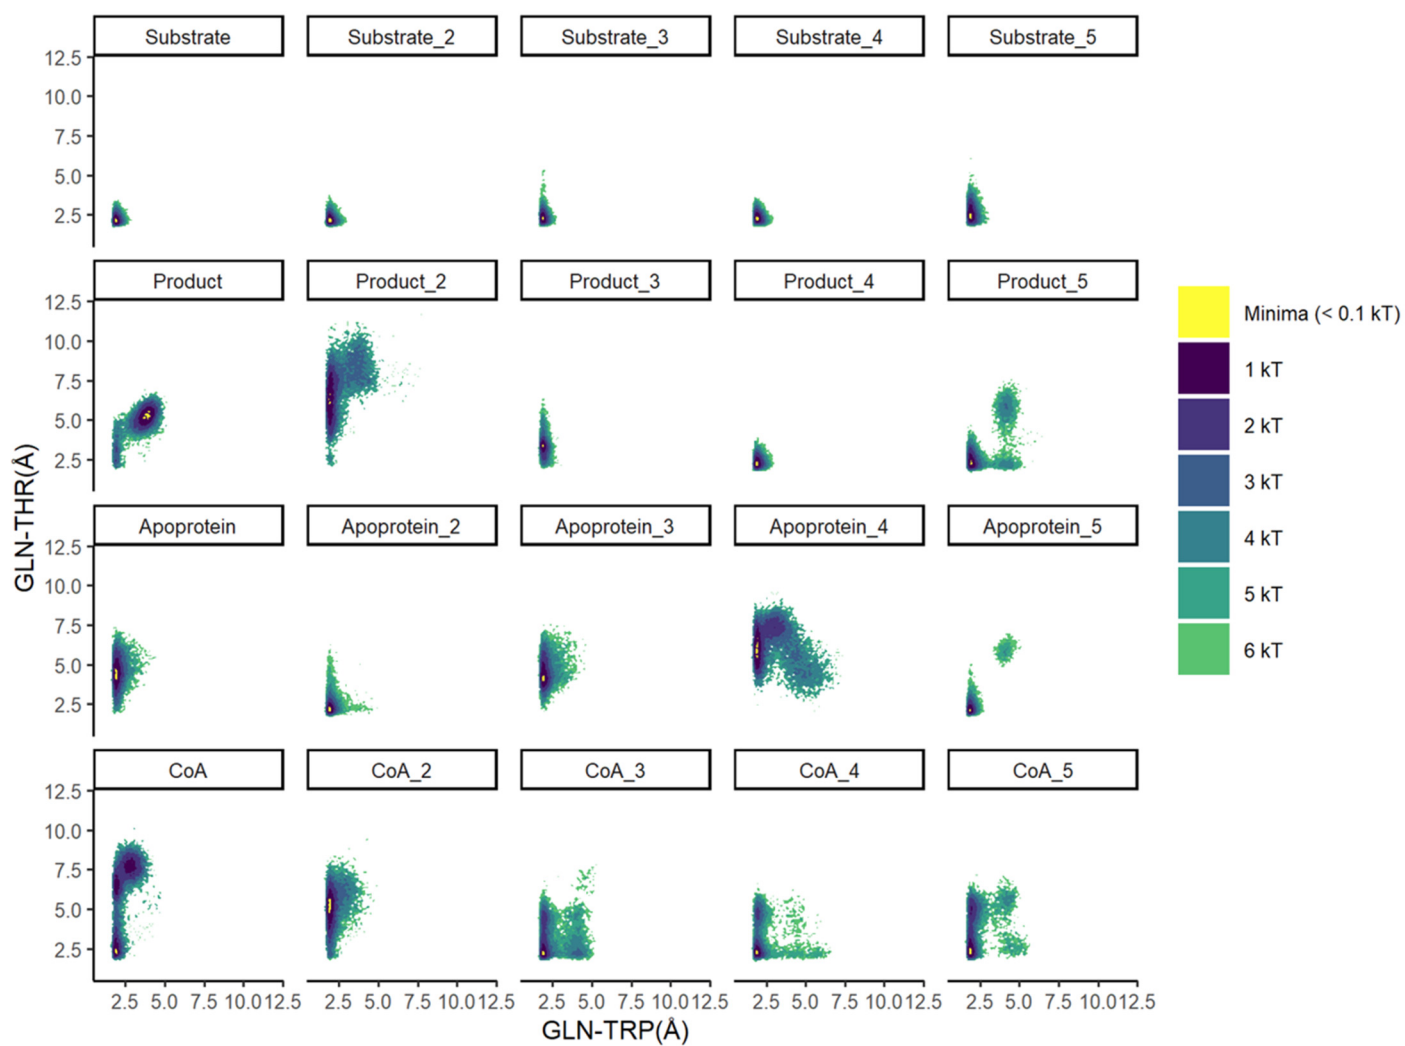

**Figure S4.**  $\Delta G$  distribution of the paired Gln-Trp and Gln-Thr distances for each kT level.

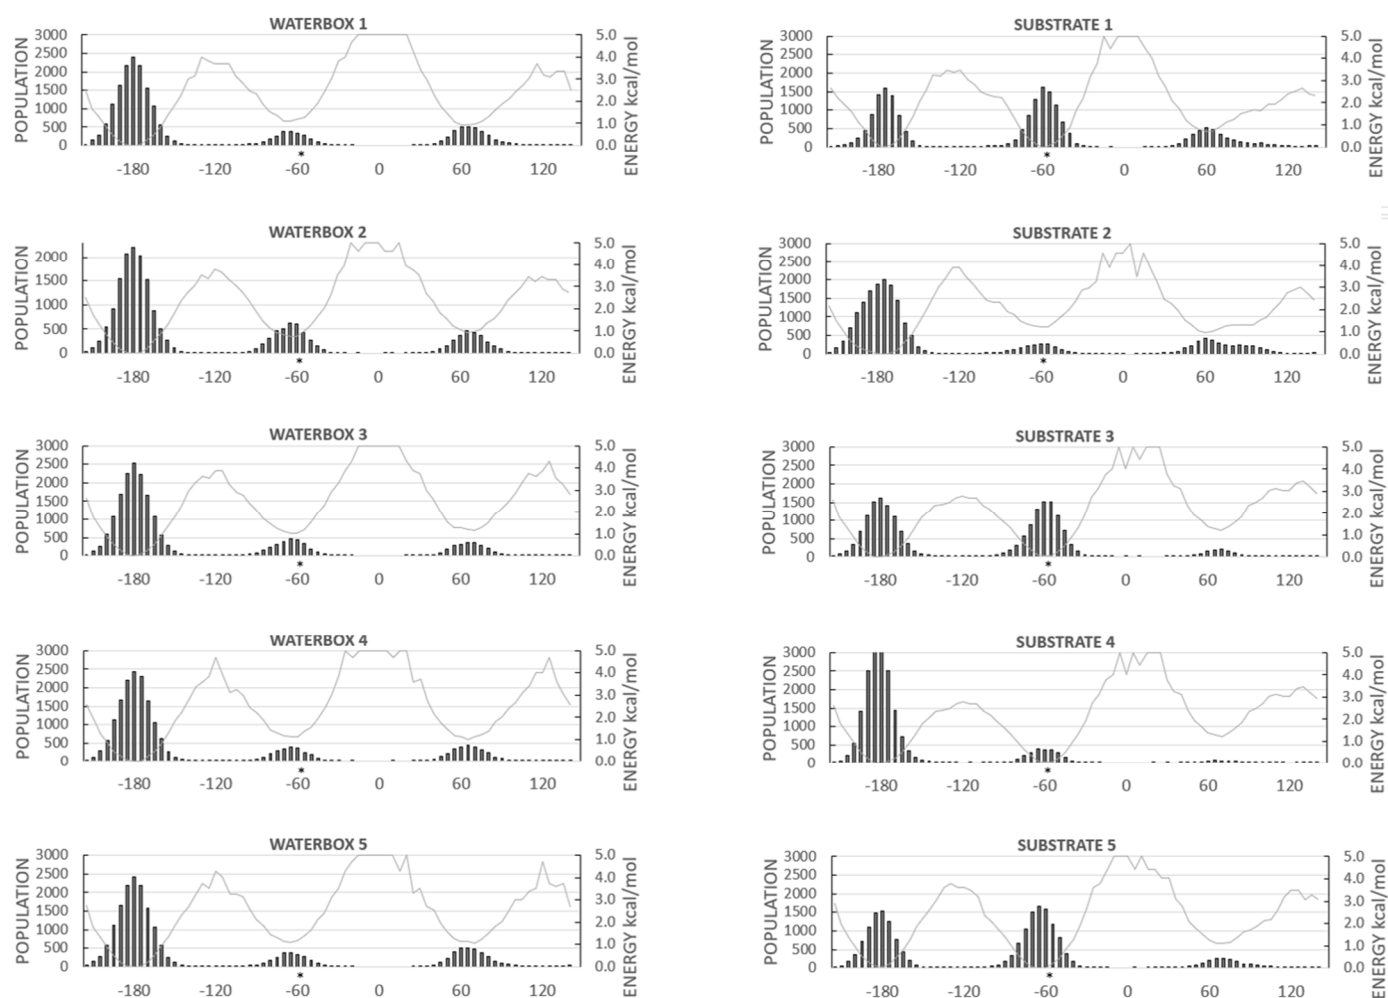

**Figure S5.** Individual waterbox simulations compared to substrate simulations. Distribution of the dihedral angle of the stearyl-CoA formed by the 8th, 9th, 10th and 11th carbon atoms with corresponding free energy. Asterix indicates the  $-60^\circ$  dihedral angle that favors the desaturation reaction.

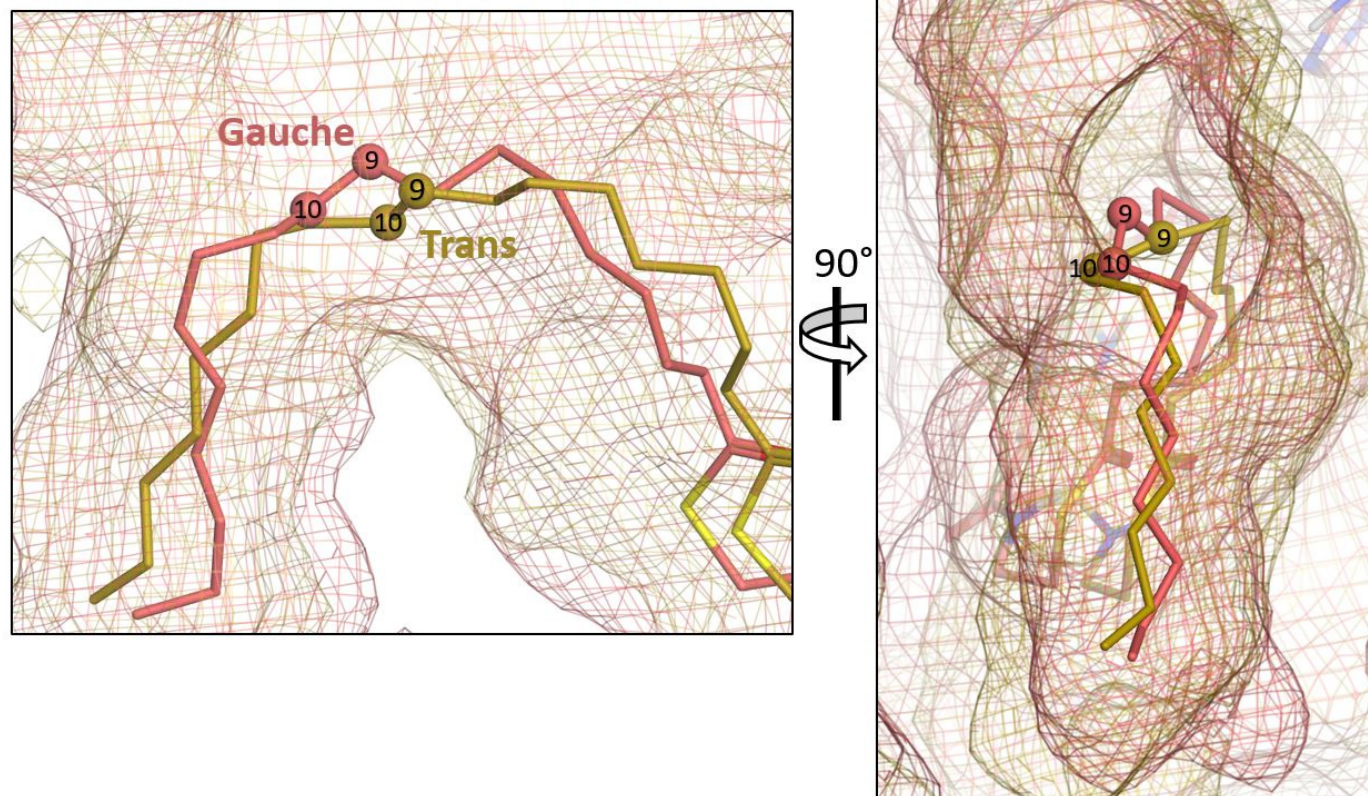

**Figure S6.** Comparison of stearyl-CoA lipid tail when the dihedral about C9 and C10 is in negative gauche (coral) vs. trans (gold) position. The tunnel shape is shown as a mesh in the corresponding colors. C9 and C10 are indicated as balls, whereas the rest of the stearyl-CoA is shown as lines. The overlaid images are example frames from the Substrate model trajectory.

**Table S1.** Mean hydrogen bond distance and percent putative hydrogen bonding over 100-ns trajectory. “Both%” column indicates the proportion of observations in which both Gln147-Trp153 and Gln147-Thr261 exhibit simultaneous hydrogen bonding (2.2 Å).

| Condition         | Residue Pairs |     |      |               |     |      |      |
|-------------------|---------------|-----|------|---------------|-----|------|------|
|                   | Gln147-Trp153 |     |      | Gln147-Thr261 |     |      | Both |
|                   | mean          | sd  | %    | mean          | sd  | %    | %    |
| Substrate models  |               |     |      |               |     |      |      |
| Substrate 1       | 2.0           | 0.2 | 91.3 | 2.3           | 0.3 | 49.3 | 45.0 |
| Substrate 2       | 2.0           | 0.2 | 88.1 | 2.3           | 0.3 | 46.6 | 40.4 |
| Substrate 3       | 1.9           | 0.2 | 94.0 | 2.4           | 0.4 | 30.3 | 28.0 |
| Substrate 4       | 2.0           | 0.2 | 87.8 | 2.4           | 0.3 | 31.5 | 26.5 |
| Substrate 5       | 2.0           | 0.2 | 88.4 | 2.6           | 0.5 | 15.9 | 13.4 |
| Average           | 2.0           | 0.2 | 89.9 | 2.4           | 0.3 | 34.7 | 30.7 |
| Product models    |               |     |      |               |     |      |      |
| Product 1         | 3.6           | 0.7 | 8.2  | 5.0           | 0.8 | 0.5  | 0.4  |
| Product 2         | 2.4           | 0.8 | 61.9 | 6.8           | 1.5 | 0.0  | 0.0  |
| Product 3         | 2.0           | 0.2 | 92.3 | 3.3           | 0.6 | 1.1  | 0.8  |
| Product 4         | 2.0           | 0.2 | 87.1 | 2.4           | 0.3 | 32.2 | 28.1 |
| Product 5         | 2.6           | 1.0 | 62.7 | 3.0           | 1.3 | 23.2 | 16.0 |
| Average           | 2.5           | 0.6 | 62.4 | 4.1           | 0.9 | 11.4 | 9.1  |
| Apoprotein models |               |     |      |               |     |      |      |
| Apoprotein 1      | 2.1           | 0.3 | 80.4 | 4.5           | 0.8 | 0.3  | 0.2  |
| Apoprotein 2      | 2.1           | 0.4 | 83.3 | 2.4           | 0.6 | 37.5 | 32.2 |
| Apoprotein 3      | 2.1           | 0.4 | 77.3 | 4.5           | 0.8 | 0.0  | 0.0  |
| Apoprotein 4      | 2.8           | 1.1 | 44.7 | 6.2           | 1.1 | 0.0  | 0.0  |
| Apoprotein 5      | 2.2           | 0.7 | 84.6 | 2.6           | 1.1 | 41.4 | 39.0 |
| Average           | 2.2           | 0.6 | 74.1 | 4.1           | 0.9 | 15.8 | 14.3 |
| CoA models        |               |     |      |               |     |      |      |
| CoA 1             | 2.4           | 0.6 | 47.8 | 6.1           | 2.1 | 3.5  | 3.1  |
| CoA 2             | 2.1           | 0.4 | 73.9 | 5.1           | 1.1 | 0.7  | 0.6  |
| CoA 3             | 2.4           | 0.8 | 67.3 | 3.1           | 1.1 | 18.1 | 12.6 |
| CoA 4             | 2.3           | 0.8 | 75.4 | 3.1           | 1.1 | 20.5 | 15.1 |
| CoA 5             | 2.2           | 0.7 | 76.3 | 3.7           | 1.3 | 10.8 | 9.4  |
| Average           | 2.3           | 0.7 | 68.1 | 4.2           | 1.3 | 10.7 | 8.2  |
